# Supplementary material
Source: publisher figshare collection journal article supplement (https://tandf.figshare.com/articles/dataset/_/6886511)

**A**

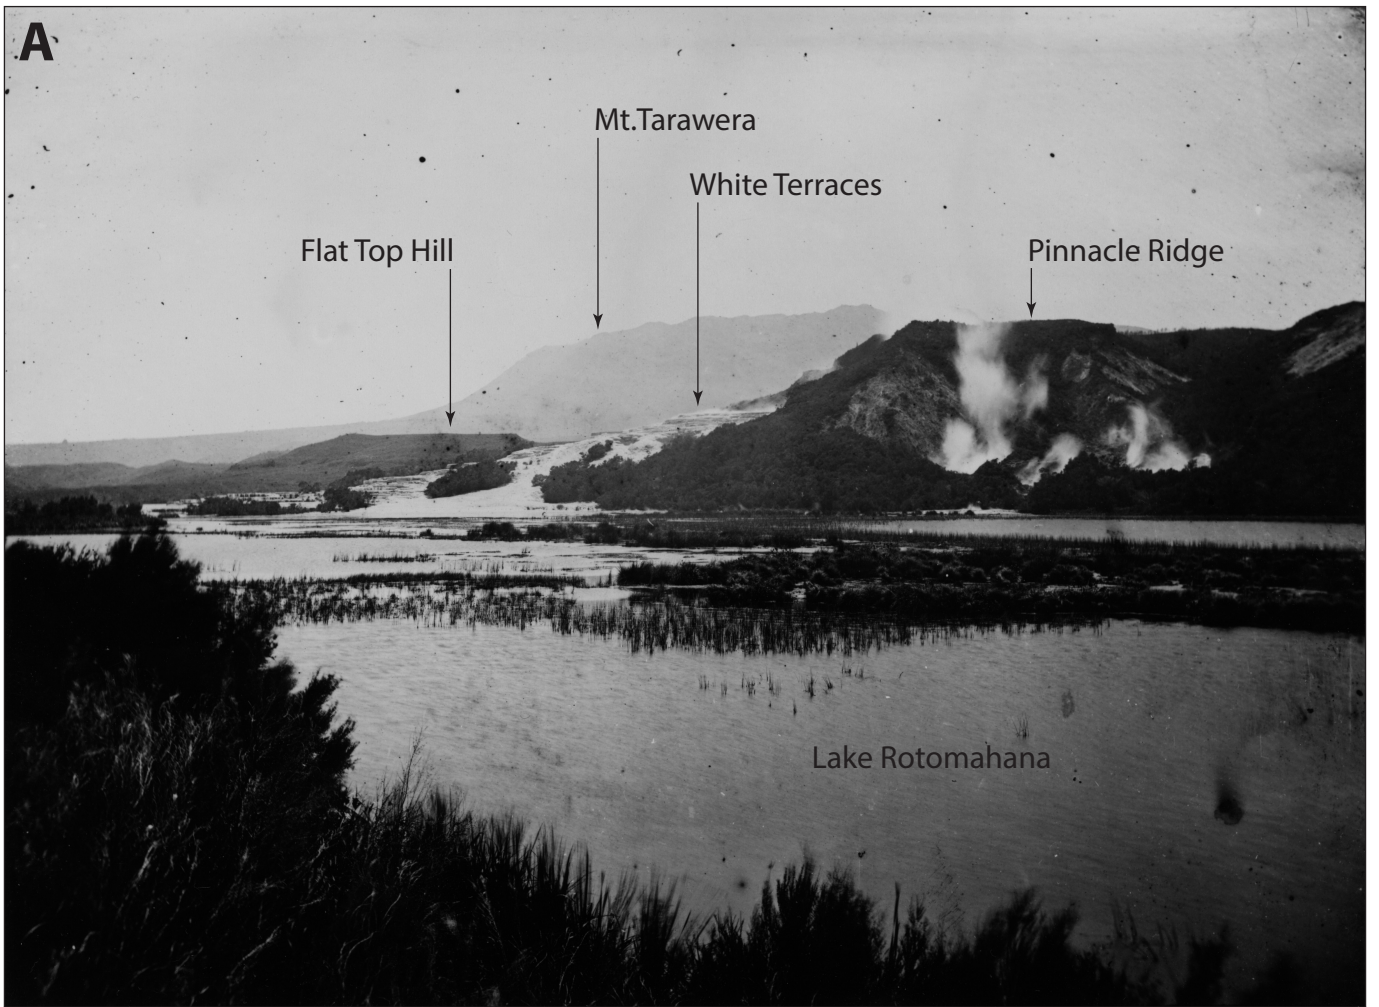

**B**

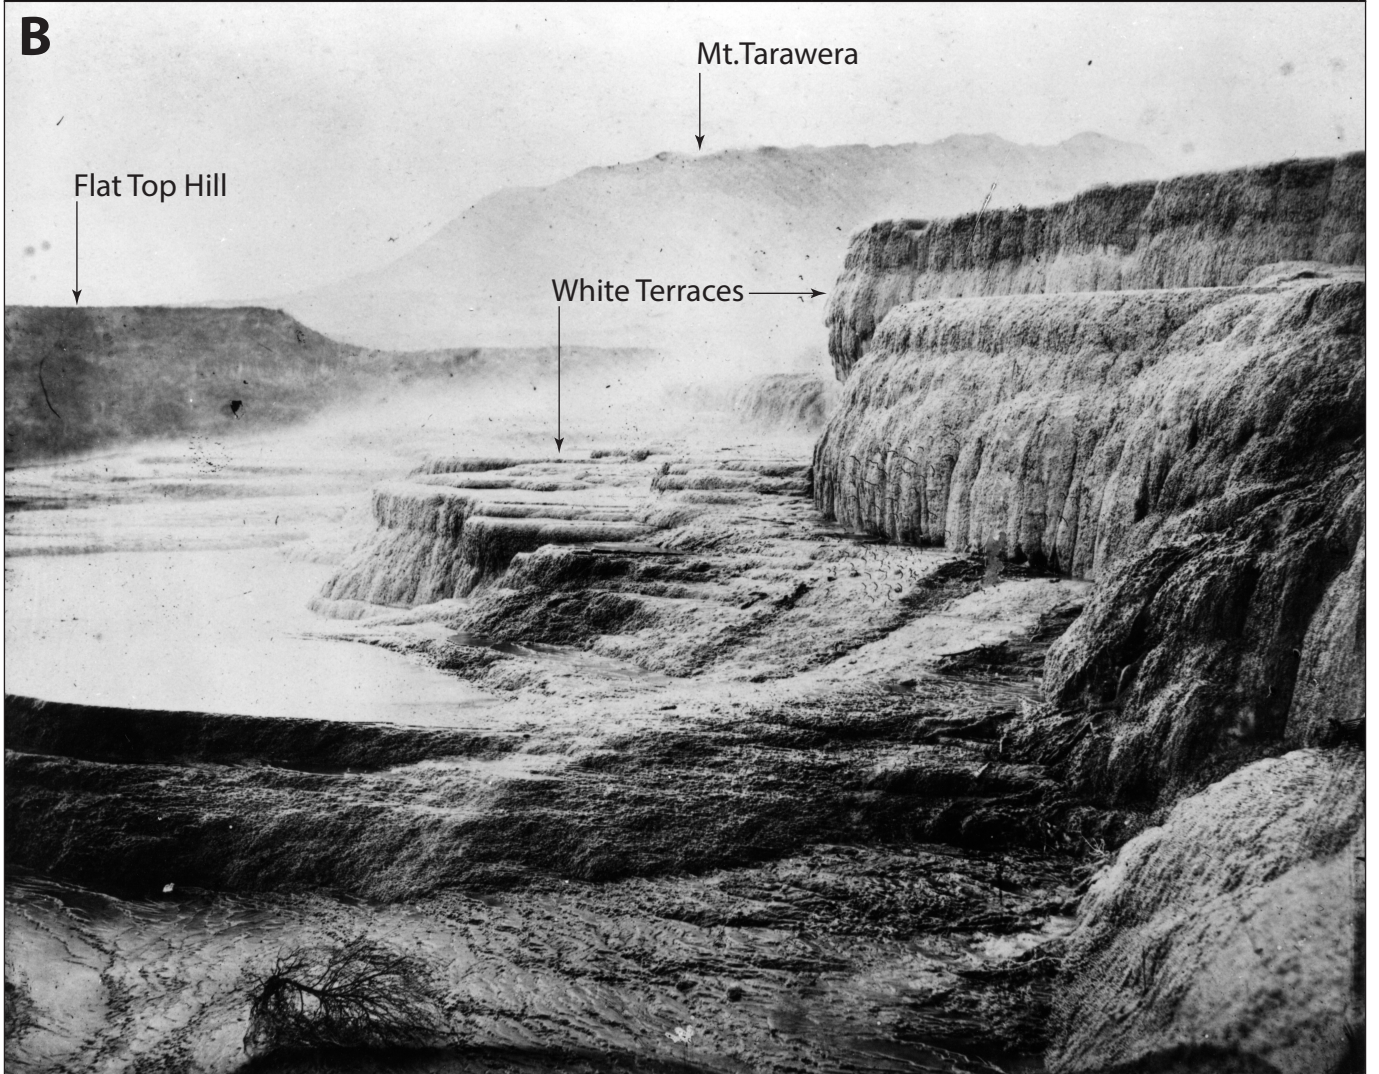

Supplement: Supplementary file 1 [file 1]
